# Supplementary material
Source: PubMed Central journal article supplement (PMC7680441)

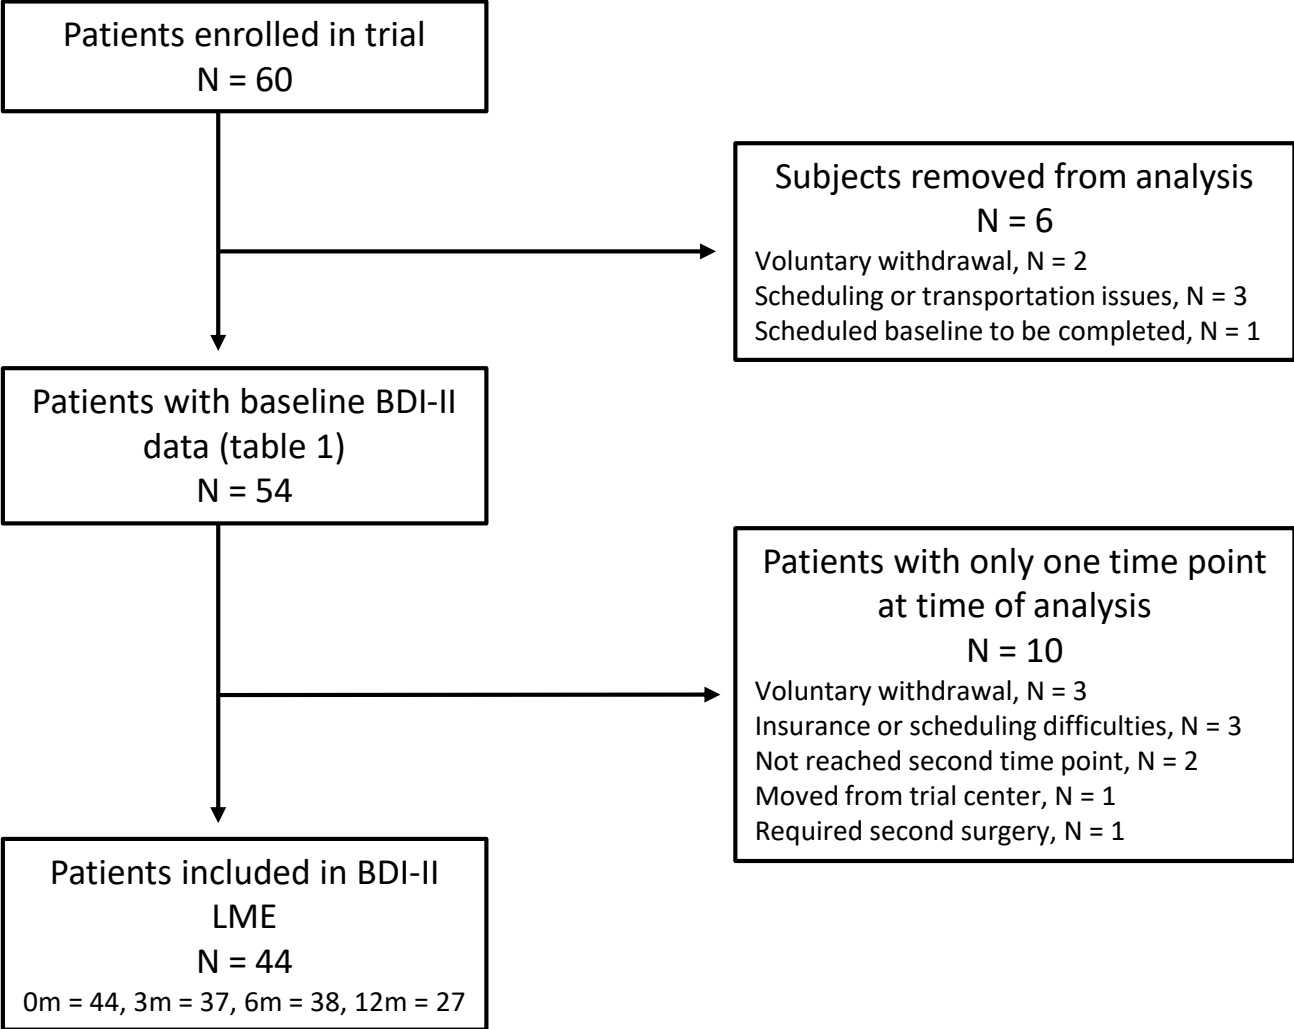

Supplement: NIHMS1622791-supplement-1.pdf [file NIHMS1622791-supplement-1.pdf]
